# Supplementary material
Source: PubMed Central journal article supplement (PMC3156554)

## Supplementary material

**Table S1.** Tree species sampled for the ‘inter-species’ study with bacterial abundances, diversity metrics, and percent of sequences in each sample belonging to each taxonomic group. OTUs = number of unique OTUs out of 750 sequences per sample. PD = Faith’s phylogenetic diversity estimated from 750 sequences per sample. Bacterial abundances reported as number of bacterial cells per cm<sup>2</sup> of leaf surface. “Proteo” = Proteobacteria. Dashes (--) indicate samples represented by fewer than 750 sequences (but more than 600).

| Sample ID | Cells/cm <sup>2</sup><br>(x10 <sup>5</sup> ) | #<br>OTUs | PD  | Species                                       | Bacteroidetes | TM7       | Actinobacteria | Firmicutes | Deinococcus/<br>Thermus | Alpha-Proteo | Beta-Proteo | Delta-Proteo | Gamma-Proteo | Proteo<br>(unclassified) | Cren-<br>archaeota<br>(Archaea) | Other |
|-----------|----------------------------------------------|-----------|-----|-----------------------------------------------|---------------|-----------|----------------|------------|-------------------------|--------------|-------------|--------------|--------------|--------------------------|---------------------------------|-------|
| Tree2     | 5.4                                          | 184       | 4.4 | <i>Abies concolor</i>                         | 23.30         | 0.67      | 8.03           | 2.56       | 3.12                    | 11.48        | 6.47        | 0.11         | 43.14        | 0.00                     | 0.33                            | 0.78  |
| Tree80    | 2.3                                          | 263       | 5.0 | <i>Acer negundo</i>                           | 6.51          | 2.87      | 11.81          | 7.28       | 6.73                    | 4.75         | 7.73        | 0.33         | 50.00        | 0.22                     | 0.11                            | 1.66  |
| Tree25    | 1                                            | 250       | 5.9 | <i>Acer platanoides</i>                       | 7.76          | 2.59      | 10.76          | 3.79       | 1.79                    | 4.29         | 10.71       | 0.32         | 55.18        | 0.76                     | 0.00                            | 2.03  |
| Tree16    | 1.4                                          | 163       | 4.5 | <i>Acer platanoides</i><br><i>'schwedler'</i> | 2.04          | 1.40      | 6.11           | 19.08      | 1.15                    | 2.67         | 14.50       | 0.38         | 51.53        | 0.13                     | 0.00                            | 1.02  |
| Tree61    | 5.6                                          | 270       | 5.7 | <i>Acer rubrum</i>                            | 34.23         | 1.78      | 17.17          | 3.46       | 3.57                    | 13.71        | 13.04       | 0.56         | 10.03        | 0.67                     | 0.33                            | 1.45  |
| Tree87    | 1.5                                          | 215       | 5.5 | <i>Acer saccharinum</i>                       | 33.48         | 0.73      | 9.71           | 3.18       | 0.91                    | 17.42        | 17.15       | 0.09         | 13.16        | 0.91                     | 1.54                            | 1.72  |
| Tree89    | 2.1                                          | 361       | 7.3 | <i>Aesculus glabra</i>                        | 8.86          | 12.6<br>3 | 15.01          | 5.29       | 9.29                    | 13.07        | 4.32        | 1.08         | 22.57        | 1.08                     | 0.65                            | 6.16  |
| Tree43    | 2                                            | 402       | 7.2 | <i>Aesculus hippocastanum</i>                 | 11.62         | 7.51      | 28.57          | 11.86      | 10.77                   | 12.83        | 5.69        | 0.48         | 5.21         | 0.73                     | 0.00                            | 4.72  |
| Tree72    | 1.4                                          | 336       | 6.3 | <i>Ailanthus altissima</i>                    | 10.42         | 3.96      | 14.00          | 15.93      | 5.50                    | 7.34         | 15.83       | 0.19         | 21.81        | 0.68                     | 0.10                            | 4.25  |
| Tree69    | 1.5                                          | 382       | 7.3 | <i>Alnus serrulata</i>                        | 8.28          | 9.96      | 17.92          | 12.05      | 14.57                   | 11.43        | 9.54        | 0.31         | 11.64        | 0.21                     | 0.10                            | 3.98  |
| Tree75    | 1.2                                          | 240       | 5.5 | <i>Carya illinoensis</i>                      | 4.71          | 3.84      | 10.66          | 3.97       | 2.60                    | 4.09         | 9.67        | 0.12         | 56.75        | 0.37                     | 0.12                            | 3.10  |
| Tree1     | 3.1                                          | 305       | 5.7 | <i>Catalpa speciosa</i>                       | 10.39         | 3.34      | 20.18          | 17.73      | 4.53                    | 12.83        | 5.64        | 0.07         | 22.03        | 0.52                     | 0.30                            | 2.45  |
| Tree88    | 6                                            | 156       | 4.1 | <i>Cedrus libani</i>                          | 66.07         | 0.53      | 4.10           | 2.42       | 0.84                    | 3.57         | 15.55       | 0.00         | 6.09         | 0.32                     | 0.21                            | 0.32  |
| Tree9     | 3.2                                          | 329       | 7.4 | <i>Celtis occidentalis</i>                    | 8.61          | 3.00      | 14.36          | 10.99      | 3.37                    | 5.99         | 8.11        | 0.37         | 37.95        | 3.62                     | 0.00                            | 3.50  |
| Tree7     | 0.6                                          | 400       | 7.9 | <i>Cercis canadensis</i>                      | 15.06         | 12.1<br>8 | 24.68          | 3.53       | 3.42                    | 5.88         | 11.97       | 1.28         | 10.79        | 1.71                     | 0.00                            | 9.51  |
| Tree55    | 5.7                                          | 424       | 7.3 | <i>Cornus alternifolia</i>                    | 7.68          | 3.57      | 28.53          | 10.01      | 5.62                    | 12.76        | 9.47        | 0.82         | 10.43        | 0.69                     | 0.41                            | 10.01 |
| Tree93    | 1.6                                          | 428       | 7.8 | <i>Cotinus coggygria</i>                      | 10.15         | 6.26      | 27.90          | 14.77      | 7.18                    | 9.64         | 7.49        | 0.82         | 3.59         | 1.54                     | 4.62                            | 6.05  |
| Tree106   | 2                                            | 307       | 6.8 | <i>Crataegus mollis</i>                       | 43.41         | 1.16      | 11.63          | 5.33       | 3.29                    | 7.17         | 8.24        | 0.29         | 14.63        | 0.97                     | 0.58                            | 3.29  |
| Tree95    | 1.7                                          | --        | --  | <i>Elaeagnus angustifolia</i>                 | 8.65          | 0.44      | 7.54           | 3.77       | 0.89                    | 4.21         | 6.43        | 0.67         | 63.41        | 0.89                     | 0.44                            | 2.66  |

|         |     |     |     |                                    |       |      |       |       |       |       |       |      |       |      |       |       |
|---------|-----|-----|-----|------------------------------------|-------|------|-------|-------|-------|-------|-------|------|-------|------|-------|-------|
| Tree58  | 4.6 | 258 | 5.3 | <i>Euonymus atropurpureus</i>      | 5.94  | 4.55 | 9.10  | 6.57  | 13.65 | 4.42  | 3.67  | 0.25 | 48.55 | 0.51 | 0.00  | 2.78  |
| Tree65  | 2.2 | 377 | 6.9 | <i>Fraxinus americana</i>          | 11.67 | 3.60 | 13.20 | 15.38 | 9.92  | 9.81  | 14.39 | 0.33 | 17.01 | 0.98 | 0.11  | 3.60  |
| Tree22  | 1.8 | 309 | 5.3 | <i>Fraxinus pennsylvanica</i>      | 10.56 | 2.22 | 13.00 | 12.11 | 6.67  | 9.56  | 7.33  | 0.22 | 35.22 | 0.44 | 0.00  | 2.67  |
| Tree91  | 1   | 242 | 5.6 | <i>Gleditsia tricanthos</i>        | 14.01 | 7.36 | 3.33  | 3.44  | 2.26  | 4.75  | 9.03  | 0.36 | 51.31 | 1.54 | 0.71  | 1.90  |
| Tree68  | 3.1 | 277 | 5.9 | <i>Koeleruteria paniculata</i>     | 9.94  | 1.69 | 8.93  | 6.21  | 2.60  | 7.91  | 8.36  | 0.79 | 50.40 | 0.34 | 0.00  | 2.82  |
| Tree70  | 1.8 | 161 | 4.3 | <i>Larix decidua</i>               | 41.24 | 0.40 | 1.45  | 0.40  | 0.13  | 13.44 | 40.32 | 0.00 | 1.19  | 0.53 | 0.26  | 0.66  |
| Tree90  | 1   | 390 | 7.1 | <i>Liquidambar styraciflua</i>     | 8.41  | 8.28 | 23.59 | 10.48 | 5.38  | 13.79 | 4.00  | 1.10 | 14.48 | 0.69 | 0.00  | 9.79  |
| Tree110 | 1.5 | 130 | 8.0 | <i>Magnolia soulangeana</i>        | 11.21 | 1.58 | 17.28 | 20.71 | 11.35 | 7.39  | 8.84  | 0.13 | 11.21 | 1.72 | 5.28  | 3.30  |
| Tree85  | 1.4 | 331 | 5.9 | <i>Magnolia stellata</i>           | 14.48 | 2.35 | 15.84 | 13.03 | 9.86  | 7.87  | 12.22 | 0.81 | 18.28 | 1.09 | 0.36  | 3.80  |
| Tree59  | 2.8 | 286 | 6.2 | <i>Morus alba</i>                  | 16.89 | 1.20 | 11.98 | 5.63  | 6.11  | 18.08 | 20.84 | 0.24 | 17.13 | 0.60 | 0.00  | 1.32  |
| Tree56  | 3.1 | 183 | 4.8 | <i>Parthenocissus quinquefolia</i> | 3.51  | 1.28 | 5.42  | 10.20 | 1.70  | 6.80  | 8.71  | 0.11 | 51.22 | 0.32 | 0.11  | 10.63 |
| Tree5   | 1.4 | 179 | 3.4 | <i>Picea pungens</i>               | 22.89 | 0.22 | 5.08  | 0.54  | 0.54  | 26.67 | 7.56  | 0.00 | 34.77 | 0.76 | 0.00  | 0.97  |
| Tree54  | 1   | 186 | 4.4 | <i>Pinus nigra</i>                 | 77.91 | 0.54 | 1.08  | 1.63  | 0.27  | 13.55 | 3.93  | 0.14 | 0.14  | 0.81 | 0.00  | 0.00  |
| Tree18  | 1.7 | 187 | 4.4 | <i>Pinus flexilis</i>              | 64.40 | 4.74 | 4.50  | 0.12  | 0.00  | 7.17  | 9.60  | 0.00 | 7.78  | 1.46 | 0.00  | 0.24  |
| Tree94  | 1.9 | 206 | 5.3 | <i>Pinus heldreichii</i>           | 71.09 | 1.67 | 4.46  | 0.00  | 0.89  | 13.95 | 5.36  | 0.56 | 0.78  | 0.45 | 0.00  | 0.78  |
| Tree77  | 2.7 | 215 | 5.0 | <i>Pinus ponderosa</i>             | 62.23 | 0.82 | 1.10  | 0.00  | 1.37  | 21.98 | 9.20  | 0.00 | 2.06  | 0.69 | 0.00  | 0.55  |
| Tree103 | 0.4 | 147 | 4.6 | <i>Pinus strobiformis</i>          | 72.51 | 0.60 | 7.55  | 0.60  | 0.45  | 10.88 | 4.23  | 0.45 | 0.15  | 1.81 | 0.15  | 0.60  |
| Tree108 | 1.2 | 401 | 8.8 | <i>Populus deltoides</i>           | 19.28 | 3.99 | 9.44  | 7.98  | 3.86  | 8.91  | 11.97 | 0.93 | 26.33 | 1.60 | 1.33  | 4.39  |
| Tree79  | 3.8 | 369 | 6.9 | <i>Prunus serotona</i>             | 30.99 | 3.10 | 13.22 | 8.68  | 6.30  | 12.91 | 9.81  | 0.41 | 10.74 | 1.34 | 0.00  | 2.48  |
| Tree71  | 1   | 182 | 4.1 | <i>Pseudotsuga menziesii</i>       | 22.59 | 0.47 | 2.82  | 1.41  | 0.71  | 44.47 | 18.47 | 0.24 | 5.76  | 1.53 | 0.00  | 1.53  |
| Tree74  | 1.7 | 220 | 5.9 | <i>Quercus bicolor</i>             | 28.42 | 3.60 | 8.00  | 3.13  | 5.80  | 3.60  | 12.76 | 0.46 | 29.81 | 0.81 | 0.00  | 3.60  |
| Tree102 | 1.7 | 110 | 3.1 | <i>Quercus coccinea</i>            | 1.17  | 0.35 | 2.46  | 2.57  | 0.12  | 0.70  | 8.07  | 0.12 | 84.09 | 0.00 | 0.00  | 0.35  |
| Tree109 | 1.1 | 298 | 7.0 | <i>Quercus macrocarpa</i>          | 18.82 | 5.89 | 9.22  | 2.69  | 1.79  | 11.40 | 7.55  | 1.02 | 9.86  | 2.18 | 24.84 | 4.74  |
| Tree66  | 2   | 155 | 5.2 | <i>Quercus palustris</i>           | 4.60  | 0.75 | 5.47  | 3.48  | 0.25  | 1.86  | 7.95  | 0.75 | 73.04 | 0.37 | 0.00  | 1.49  |
| Tree78  | 1.4 | 292 | 5.9 | <i>Quercus robur</i>               | 5.07  | 3.67 | 11.76 | 9.82  | 4.21  | 6.36  | 6.58  | 0.11 | 49.95 | 0.32 | 0.11  | 2.05  |
| Tree73  | 1.2 | 28  | 1.3 | <i>Quercus rubra</i>               | 0.21  | 0.00 | 0.11  | 0.00  | 0.00  | 2.53  | 0.21  | 0.00 | 96.62 | 0.11 | 0.00  | 0.21  |
| Tree92  | 1.6 | 93  | 3.8 | <i>Quercus velutina</i>            | 1.53  | 0.38 | 2.01  | 0.77  | 0.96  | 2.30  | 1.05  | 0.10 | 89.94 | 0.57 | 0.10  | 0.29  |
| Tree60  | 2.9 | 376 | 6.9 | <i>Rhamnus cathartica</i>          | 13.98 | 2.74 | 21.58 | 8.81  | 5.07  | 21.38 | 5.07  | 0.30 | 16.11 | 0.91 | 0.20  | 3.85  |
| Tree81  | 3   | 240 | 5.9 | <i>Salix nigra</i>                 | 10.13 | 5.23 | 11.14 | 4.12  | 1.56  | 2.67  | 16.70 | 0.45 | 43.43 | 0.56 | 0.45  | 3.56  |
| Tree99  | 1   | 346 | 7.7 | <i>Sambucus sp.</i>                | 10.93 | 4.37 | 16.16 | 12.45 | 3.04  | 4.56  | 14.64 | 1.43 | 27.09 | 2.09 | 0.19  | 3.04  |
| Tree62  | 1   | --  | --  | <i>Taxodium distichum</i>          | 12.73 | 0.93 | 10.56 | 5.90  | 0.31  | 12.73 | 15.53 | 0.31 | 33.23 | 0.93 | 0.00  | 6.83  |

|         |     |     |     |                               |       |           |       |       |       |       |       |      |       |      |      |      |
|---------|-----|-----|-----|-------------------------------|-------|-----------|-------|-------|-------|-------|-------|------|-------|------|------|------|
| Tree86  | 1   | --  | --  | <i>Taxus sp.</i>              | 2.15  | 1.51      | 3.87  | 17.85 | 3.23  | 2.58  | 6.02  | 0.22 | 60.65 | 0.65 | 0.65 | 0.65 |
| Tree97  | 2.3 | 137 | 3.8 | <i>Thuja<br/>occidentalis</i> | 56.88 | 1.16      | 5.14  | 0.17  | 4.31  | 10.78 | 17.91 | 0.00 | 0.83  | 2.16 | 0.17 | 0.50 |
| Tree20  | 1   | 164 | 4.9 | <i>Tilia americana</i>        | 2.91  | 1.45      | 5.92  | 1.25  | 1.56  | 2.28  | 5.50  | 0.52 | 76.01 | 0.31 | 0.00 | 2.28 |
| Tree64  | 1.8 | 278 | 5.9 | <i>Tsuga<br/>canadensis</i>   | 39.33 | 8.15      | 11.00 | 4.40  | 10.87 | 5.95  | 9.70  | 0.65 | 5.05  | 0.26 | 0.00 | 4.66 |
| Tree101 | 2.9 | 166 | 4.5 | <i>Tsuga<br/>mertensiana</i>  | 31.04 | 56.7<br>1 | 4.55  | 0.05  | 0.16  | 5.40  | 1.06  | 0.12 | 0.03  | 0.53 | 0.00 | 0.36 |
| Tree83  | 2.7 | 208 | 5.6 | <i>Ulmus<br/>americana</i>    | 29.72 | 0.90      | 10.85 | 3.05  | 0.90  | 3.39  | 25.20 | 0.79 | 23.50 | 0.79 | 0.00 | 0.90 |

**Table S2.** Most common groups of bacteria across all samples included in the ‘inter-species’ study with average relative abundance (% of sequences) of each taxon per sample and the average relative abundance across all samples combined. Standard errors indicated in parantheses.

|                                         | Mean % of sequences per sample | Total number of sequences (all samples combined) | % of total sequences (all samples combined) |
|-----------------------------------------|--------------------------------|--------------------------------------------------|---------------------------------------------|
| Sphingobacteriales (Bacteroidetes)      | 20.1 (2.8)                     | 13284                                            | 21.3                                        |
| Enterobacteriales (Gammaproteobacteria) | 23.9 (3.3)                     | 12897                                            | 20.6                                        |
| TM7                                     | 4.1 (1.0)                      | 8806                                             | 14.1                                        |
| Actinomycetales (Actinobacteria)        | 9.6 (0.9)                      | 5495                                             | 8.8                                         |
| Burkholderiales (Betaproteobacteria)    | 8.6 (0.9)                      | 4473                                             | 7.2                                         |
| Deinococcales (Deinococcus-Thermus)     | 3.7 (0.5)                      | 1886                                             | 3.0                                         |
| Rhodospirillales (Alphaproteobacteria)  | 3.4 (0.7)                      | 1853                                             | 3.0                                         |
| Sphingomonadales (Alphaproteobacteria)  | 2.7 (0.3)                      | 1487                                             | 2.4                                         |
| Unclassified Gammaproteobacteria        | 2.2 (0.7)                      | 1050                                             | 1.7                                         |
| Bacillales (Firmicutes)                 | 1.9 (0.2)                      | 973                                              | 1.6                                         |
| Lactobacillales (Firmicutes)            | 1.8 (0.3)                      | 944                                              | 1.5                                         |
| Pseudomonadales (Gammaproteobacteria)   | 2.0 (0.4)                      | 909                                              | 1.5                                         |

**Table S3.** Diversity by plant order. Number of OTUs and Faith's PD given for random sample of 750 sequences per sample to compensate for differences in sampling effort between samples.

Standard deviations and ranges are given for those orders represented by more than one species.

| Order               | OTUs    |        |        | PD      |       |       |
|---------------------|---------|--------|--------|---------|-------|-------|
|                     | Average | StDev  | Range  | Average | StDev | Range |
| <i>Malvales</i>     | 163.59  | --     | --     | 4.93    | --    | --    |
| <i>Vitales</i>      | 183.31  | --     | --     | 4.79    | --    | --    |
| <i>Pinales</i>      | 197.39  | 15.07  | 78.29  | 4.7     | 0.23  | 1.97  |
| <i>Fagales</i>      | 202.03  | 40.37  | 353.64 | 5       | 0.68  | 6     |
| <i>Magnoliales</i>  | 230.12  | 100.38 | 200.76 | 6.94    | 1.02  | 2.03  |
| <i>Celastrales</i>  | 257.67  | --     |        | 5.33    | --    | --    |
| <i>Sapindales</i>   | 298.39  | 31.61  | 264.93 | 6.29    | 0.38  | 3.29  |
| <i>Rosales</i>      | 310.61  | 14.84  | 167.7  | 6.34    | 0.3   | 1.73  |
| <i>Fabales</i>      | 320.77  | 79.2   | 158.4  | 6.745   | 1.18  | 2.35  |
| <i>Malpighiales</i> | 320.97  | 80.52  | 161.03 | 7.35    | 1.43  | 2.85  |
| <i>Lamiales</i>     | 330.38  | 23.52  | 72.4   | 5.95    | 0.49  | 1.62  |
| <i>Dipsacales</i>   | 346.31  | --     | --     | 7.74    | --    | --    |
| <i>Saxifragales</i> | 390.4   | --     | --     | 7.12    | --    | --    |
| <i>Cornales</i>     | 423.52  | --     | --     | 7.26    | --    | --    |

**Table S4.** Trees sampled for the three studies, the location of the trees (in decimal degrees), and the taxonomic description of the trees. The “geographic” study refers to the study comparing *Pinus ponderosa* bacterial communities at different spatial scales. The “inter-species” study refers to the study comparing bacterial communities on individual trees from each tree species and the “intra-species” study is the study comparing bacterial communities on individual trees of the same species and within a given tree. The replicates column indicates whether that tree served as a replicate individual from that given species (sp.) or a replicate sample taken from a single tree (indiv).

| SampleID | Study         | Latitude | Longitude | Order        | Family       | Genus_Species                          | Replicate    |
|----------|---------------|----------|-----------|--------------|--------------|----------------------------------------|--------------|
| AA       | Geographic    | -35.3039 | 149.0950  | Pinales      | Pinaceae     | <i>Pinus ponderosa</i>                 | --           |
| AB       | Geographic    | -35.3039 | 149.0950  | Pinales      | Pinaceae     | <i>Pinus ponderosa</i>                 | --           |
| AC       | Geographic    | -35.3039 | 149.0950  | Pinales      | Pinaceae     | <i>Pinus ponderosa</i>                 | --           |
| AD       | Geographic    | -35.3039 | 149.0950  | Pinales      | Pinaceae     | <i>Pinus ponderosa</i>                 | --           |
| AE       | Geographic    | -35.3039 | 149.0950  | Pinales      | Pinaceae     | <i>Pinus ponderosa</i>                 | --           |
| CA1A     | Geographic    | 39.3751  | -123.3274 | Pinales      | Pinaceae     | <i>Pinus ponderosa</i>                 | --           |
| CA1B     | Geographic    | 39.3752  | -123.3276 | Pinales      | Pinaceae     | <i>Pinus ponderosa</i>                 | --           |
| CA1C     | Geographic    | 39.3754  | -123.3279 | Pinales      | Pinaceae     | <i>Pinus ponderosa</i>                 | --           |
| CA2A     | Geographic    | 39.4047  | -123.3538 | Pinales      | Pinaceae     | <i>Pinus ponderosa</i>                 | --           |
| CA2B     | Geographic    | 39.4047  | -123.3538 | Pinales      | Pinaceae     | <i>Pinus ponderosa</i>                 | --           |
| CA2C     | Geographic    | 39.4089  | -123.3549 | Pinales      | Pinaceae     | <i>Pinus ponderosa</i>                 | --           |
| CA3A     | Geographic    | 39.6924  | -123.4757 | Pinales      | Pinaceae     | <i>Pinus ponderosa</i>                 | --           |
| CA3B     | Geographic    | 39.6929  | -123.4770 | Pinales      | Pinaceae     | <i>Pinus ponderosa</i>                 | --           |
| CA3C     | Geographic    | 39.6942  | -123.4764 | Pinales      | Pinaceae     | <i>Pinus ponderosa</i>                 | --           |
| CU1      | Geographic    | 40.0083  | -105.2700 | Pinales      | Pinaceae     | <i>Pinus ponderosa</i>                 | --           |
| CU2      | Geographic    | 40.0100  | -105.2717 | Pinales      | Pinaceae     | <i>Pinus ponderosa</i>                 | --           |
| CU3      | Geographic    | 40.0067  | -105.2733 | Pinales      | Pinaceae     | <i>Pinus ponderosa</i>                 | --           |
| FC1      | Geographic    | 40.6320  | -105.1991 | Pinales      | Pinaceae     | <i>Pinus ponderosa</i>                 | --           |
| FC2      | Geographic    | 40.6419  | -105.1990 | Pinales      | Pinaceae     | <i>Pinus ponderosa</i>                 | --           |
| FC3      | Geographic    | 40.6350  | -105.2200 | Pinales      | Pinaceae     | <i>Pinus ponderosa</i>                 | --           |
| Tree1    | Inter-Species | 40.0084  | -105.2705 | Lamiales     | Bignoniaceae | <i>Catalpa</i> sp.                     | sp           |
| Tree101  | Inter-Species | 40.0099  | -105.2722 | Pinales      | Pinaceae     | <i>Tsuga mertensiana</i>               | --           |
| Tree102  | Inter-Species | 40.0094  | -105.2730 | Fagales      | Fagaceae     | <i>Quercus coccinea</i>                | --           |
| Tree103  | Inter-Species | 40.0092  | -105.2731 | Pinales      | Pinaceae     | <i>Pinus strobiformis</i>              | --           |
| Tree106  | Inter-Species | 40.0091  | -105.2722 | Rosales      | Rosaceae     | <i>Crataegus mollis</i>                | --           |
| Tree108  | Inter-Species | 40.0088  | -105.2731 | Malpighiales | Salicaceae   | <i>Populus deltoides</i>               | --           |
| Tree109  | Inter-Species | 40.0084  | -105.2718 | Fagales      | Fagaceae     | <i>Quercus macrocarpa</i>              | --           |
| Tree110  | Inter-Species | 40.0079  | -105.2714 | Magnoliales  | Magnoliaceae | <i>Magnolia soulangeana</i>            | --           |
| Tree16   | Inter-Species | 40.0094  | -105.2703 | Sapindales   | Sapindaceae  | <i>Acer platanoides</i><br>'schwedler' | sp           |
| Tree18   | Inter-Species | 40.0098  | -105.2711 | Pinales      | Pinaceae     | <i>Pinus flexilis</i>                  | sp           |
| Tree2    | Inter-Species | 40.0083  | -105.2705 | Pinales      | Pinaceae     | <i>Abies concolor</i>                  | sp and indiv |
| Tree20   | Inter-Species | 40.0096  | -105.2713 | Malvales     | Malvaceae    | <i>Tilia americana</i>                 | sp           |
| Tree22   | Inter-Species | 40.0102  | -105.2718 | Lamiales     | Oleaceae     | <i>Fraxinus pennsylvanica</i>          | sp and indiv |
| Tree25   | Inter-Species | 40.0097  | -105.2721 | Sapindales   | Sapindaceae  | <i>Acer platanoides</i>                | sp           |

|        |               |         |           |              |                |                                     |              |
|--------|---------------|---------|-----------|--------------|----------------|-------------------------------------|--------------|
| Tree43 | Inter-Species | 40.0075 | -105.2729 | Sapindales   | Sapindaceae    | <i>Aesculus hippocastanum</i>       | sp           |
| Tree5  | Inter-Species | 40.0083 | -105.2706 | Pinales      | Pinaceae       | <i>Picea pungens</i>                | sp           |
| Tree54 | Inter-Species | 40.0091 | -105.2701 | Pinales      | Pinaceae       | <i>Pinus nigra</i>                  | --           |
| Tree55 | Inter-Species | 40.0075 | -105.2719 | Cornales     | Cornaceae      | <i>Cornus alternifolia</i>          | --           |
| Tree56 | Inter-Species | 40.0071 | -105.2724 | Vitales      | Vitaceae       | <i>Parthenocissus quinquefolia</i>  | --           |
| Tree58 | Inter-Species | 40.0070 | -105.2725 | Celastrales  | Celastraceae   | <i>Euonymus atropurpureus</i>       | --           |
| Tree59 | Inter-Species | 40.0066 | -105.2728 | Rosales      | Moraceae       | <i>Morus alba</i>                   | --           |
| Tree60 | Inter-Species | 40.0071 | -105.2729 | Rosales      | Rhamnaceae     | <i>Rhamnus cathartica</i>           | --           |
| Tree61 | Inter-Species | 40.0072 | -105.2734 | Sapindales   | Sapindaceae    | <i>Acer rubrum</i>                  | --           |
| Tree62 | Inter-Species | 40.0073 | -105.2734 | Pinales      | Cupressaceae   | <i>Taxodium distichum</i>           | --           |
| Tree64 | Inter-Species | 40.0078 | -105.2730 | Pinales      | Pinaceae       | <i>Tsuga canadensis</i>             | --           |
| Tree65 | Inter-Species | 40.0080 | -105.2738 | Lamiales     | Oleaceae       | <i>Fraxinus americana</i>           | --           |
| Tree66 | Inter-Species | 40.0084 | -105.2741 | Fagales      | Fagaceae       | <i>Quercus palustris</i>            | --           |
| Tree68 | Inter-Species | 40.0082 | -105.2746 | Sapindales   | Sapindaceae    | <i>Koelreuteria paniculata</i>      | --           |
| Tree69 | Inter-Species | 40.0081 | -105.2749 | Fagales      | Betulaceae     | <i>Alnus serrulata</i>              | --           |
| Tree7  | Inter-Species | 40.0089 | -105.2699 | Fabales      | Fabaceae       | <i>Cercis canadensis</i>            | sp and indiv |
| Tree70 | Inter-Species | 40.0084 | -105.2751 | Pinales      | Pinaceae       | <i>Larix decidua</i>                | --           |
| Tree71 | Inter-Species | 40.0085 | -105.2749 | Pinales      | Pinaceae       | <i>Psuedotsuga menziesii</i>        | --           |
| Tree72 | Inter-Species | 40.0084 | -105.2748 | Sapindales   | Simaroubaceae  | <i>Ailanthus altissima</i>          | --           |
| Tree73 | Inter-Species | 40.0087 | -105.2751 | Fagales      | Fagaceae       | <i>Quercus rubra</i>                | --           |
| Tree74 | Inter-Species | 40.0088 | -105.2748 | Fagales      | Fagaceae       | <i>Quercus bicolor</i>              | --           |
| Tree75 | Inter-Species | 40.0088 | -105.2748 | Fagales      | Juglandaceae   | <i>Carya illinoensis</i>            | --           |
| Tree77 | Inter-Species | 40.0091 | -105.2752 | Pinales      | Pinaceae       | <i>Pinus ponderosa</i>              | --           |
| Tree78 | Inter-Species | 40.0094 | -105.2755 | Fagales      | Fagaceae       | <i>Quercus robur</i>                | --           |
| Tree79 | Inter-Species | 40.0091 | -105.2741 | Rosales      | Rosaceae       | <i>Prunus serotona</i>              | --           |
| Tree80 | Inter-Species | 40.0090 | -105.2745 | Sapindales   | Sapindaceae    | <i>Acer negundo</i>                 | --           |
| Tree81 | Inter-Species | 40.0086 | -105.2747 | Malpighiales | Salicaceae     | <i>Salix nigra</i>                  | --           |
| Tree83 | Inter-Species | 40.0087 | -105.2744 | Rosales      | Ulmaceae       | <i>Ulmus americana</i>              | --           |
| Tree85 | Inter-Species | 40.0079 | -105.2714 | Magnoliales  | Magnoliaceae   | <i>Magnolia stellata</i>            | --           |
| Tree86 | Inter-Species | 40.0076 | -105.2717 | Pinales      | Taxaceae       | <i>Taxus sp.</i>                    | --           |
| Tree87 | Inter-Species | 40.0081 | -105.2711 | Sapindales   | Sapindaceae    | <i>Acer saccharinum</i>             | --           |
| Tree88 | Inter-Species | 40.0087 | -105.2700 | Pinales      | Pinaceae       | <i>Cedrus libani</i>                | --           |
| Tree89 | Inter-Species | 40.0081 | -105.2694 | Sapindales   | Sapindaceae    | <i>Aesculus glabra</i>              | --           |
| Tree9  | Inter-Species | 40.0087 | -105.2699 | Rosales      | Cannabaceae    | <i>Celtis occidentalis</i>          | sp           |
| Tree90 | Inter-Species | 40.0081 | -105.2778 | Saxifragales | Altingaceae    | <i>Liquidambar styraciflua</i>      | --           |
| Tree91 | Inter-Species | 40.0094 | -105.2691 | Fabales      | Fabaceae       | <i>Gleditsia tricanthos</i>         | --           |
| Tree92 | Inter-Species | 40.0095 | -105.2703 | Fagales      | Fagaceae       | <i>Quercus velutina</i>             | --           |
| Tree93 | Inter-Species | 40.0096 | -105.2706 | Sapindales   | Anacardiaceae  | <i>Cotinus coggygria</i>            | --           |
| Tree94 | Inter-Species | 40.0102 | -105.2703 | Pinales      | Pinaceae       | <i>Pinus heldreichii</i>            | --           |
| Tree95 | Inter-Species | 40.0097 | -105.2710 | Rosales      | Elaeagnaceae   | <i>Elaeagnus angustifolia</i>       | --           |
| Tree97 | Inter-Species | 40.0093 | -105.2710 | Pinales      | Cupressaceae   | <i>Thuja occidentalis</i>           | --           |
| Tree99 | Inter-Species | 40.0099 | -105.2721 | Dipsacales   | Caprifoliaceae | <i>Sambucus sp.</i>                 | --           |
| Tree1  | Intra-species | 40.0084 | -105.2705 | Lamiales     | Bignoniaceae   | <i>Catalpa sp.</i>                  | sp           |
| Tree12 | Intra-species | 40.0092 | -105.2690 | Rosales      | Cannabaceae    | <i>Celtis occidentalis</i>          | sp and indiv |
| Tree14 | Intra-species | 40.0093 | -105.2692 | Pinales      | Pinaceae       | <i>Picea pungens</i>                | sp and indiv |
| Tree15 | Intra-species | 40.0093 | -105.2692 | Pinales      | Pinaceae       | <i>Picea pungens</i>                | sp and indiv |
| Tree16 | Intra-species | 40.0094 | -105.2703 | Sapindales   | Sapindaceae    | <i>Acer platanoides 'schwedler'</i> | sp           |
| Tree17 | Intra-species | 40.0096 | -105.2708 | Sapindales   | Sapindaceae    | <i>Aesculus hippocastanum</i>       | sp and indiv |
| Tree18 | Intra-species | 40.0098 | -105.2711 | Pinales      | Pinaceae       | <i>Pinus flexilis</i>               | sp           |
| Tree19 | Intra-species | 40.0098 | -105.2711 | Pinales      | Pinaceae       | <i>Pinus flexilis</i>               | sp           |
| Tree2  | Intra-species | 40.0083 | -105.2705 | Pinales      | Pinaceae       | <i>Abies concolor</i>               | sp and indiv |
| Tree20 | Intra-species | 40.0096 | -105.2713 | Malvales     | Malvaceae      | <i>Tilia americana</i>              | sp           |
| Tree22 | Intra-species | 40.0102 | -105.2718 | Lamiales     | Oleaceae       | <i>Fraxinus pennsylvanica</i>       | sp and indiv |
| Tree23 | Intra-species | 40.0102 | -105.2718 | Lamiales     | Oleaceae       | <i>Fraxinus pennsylvanica</i>       | sp and indiv |
| Tree24 | Intra-species | 40.0093 | -105.2712 | Sapindales   | Sapindaceae    | <i>Acer platanoides 'schwedler'</i> | sp           |

|        |               |         |           |            |              |                               |              |
|--------|---------------|---------|-----------|------------|--------------|-------------------------------|--------------|
| Tree26 | Intra-species | 40.0093 | -105.2707 | Lamiales   | Bignoniaceae | <i>Catalpa sp.</i>            | sp           |
| Tree27 | Intra-species | 40.0100 | -105.2721 | Rosales    | Cannabaceae  | <i>Celtis occidentalis</i>    | sp           |
| Tree28 | Intra-species | 40.0092 | -105.2690 | Rosales    | Cannabaceae  | <i>Celtis occidentalis</i>    | sp and indiv |
| Tree29 | Intra-species | 40.0092 | -105.2690 | Rosales    | Cannabaceae  | <i>Celtis occidentalis</i>    | sp and indiv |
| Tree3  | Intra-species | 40.0083 | -105.2705 | Pinales    | Pinaceae     | <i>Abies concolor</i>         | sp and indiv |
| Tree30 | Intra-species | 40.0098 | -105.2734 | Malvales   | Malvaceae    | <i>Tilia americana</i>        | sp           |
| Tree33 | Intra-species | 40.0091 | -105.2746 | Lamiales   | Oleaceae     | <i>Fraxinus pennsylvanica</i> | sp           |
| Tree35 | Intra-species | 40.0090 | -105.2755 | Pinales    | Pinaceae     | <i>Pinus flexilis</i>         | sp and indiv |
| Tree36 | Intra-species | 40.0090 | -105.2755 | Pinales    | Pinaceae     | <i>Pinus flexilis</i>         | sp and indiv |
| Tree37 | Intra-species | 40.0078 | -105.2730 | Malvales   | Malvaceae    | <i>Tilia americana</i>        | sp and indiv |
| Tree38 | Intra-species | 40.0078 | -105.2730 | Malvales   | Malvaceae    | <i>Tilia americana</i>        | sp and indiv |
| Tree39 | Intra-species | 40.0078 | -105.2730 | Malvales   | Malvaceae    | <i>Tilia americana</i>        | sp and indiv |
| Tree4  | Intra-species | 40.0083 | -105.2705 | Pinales    | Pinaceae     | <i>Abies concolor</i>         | sp and indiv |
| Tree40 | Intra-species | 40.0073 | -105.2733 | Lamiales   | Bignoniaceae | <i>Catalpa sp.</i>            | sp and indiv |
| Tree41 | Intra-species | 40.0073 | -105.2733 | Lamiales   | Bignoniaceae | <i>Catalpa sp.</i>            | sp and indiv |
| Tree42 | Intra-species | 40.0073 | -105.2733 | Lamiales   | Bignoniaceae | <i>Catalpa sp.</i>            | sp and indiv |
| Tree43 | Intra-species | 40.0075 | -105.2729 | Sapindales | Sapindaceae  | <i>Aesculus hippocastanum</i> | sp           |
| Tree44 | Intra-species | 40.0096 | -105.2708 | Sapindales | Sapindaceae  | <i>Aesculus hippocastanum</i> | sp and indiv |
| Tree45 | Intra-species | 40.0096 | -105.2708 | Sapindales | Sapindaceae  | <i>Aesculus hippocastanum</i> | sp and indiv |
| Tree46 | Intra-species | 40.0068 | -105.2726 | Sapindales | Sapindaceae  | <i>Acer platanoides</i>       | sp           |
| Tree47 | Intra-species | 40.0068 | -105.2729 | Sapindales | Sapindaceae  | <i>Acer platanoides</i>       | sp and indiv |
| Tree48 | Intra-species | 40.0068 | -105.2729 | Sapindales | Sapindaceae  | <i>Acer platanoides</i>       | sp and indiv |
| Tree49 | Intra-species | 40.0068 | -105.2729 | Sapindales | Sapindaceae  | <i>Acer platanoides</i>       | sp and indiv |
| Tree5  | Intra-species | 40.0083 | -105.2706 | Pinales    | Pinaceae     | <i>Picea pungens</i>          | sp           |
| Tree50 | Intra-species | 40.0069 | -105.2726 | Lamiales   | Oleaceae     | <i>Fraxinus pennsylvanica</i> | sp           |
| Tree51 | Intra-species | 40.0076 | -105.2719 | Pinales    | Pinaceae     | <i>Abies concolor</i>         | sp           |
| Tree53 | Intra-species | 40.0079 | -105.2706 | Fabales    | Fabaceae     | <i>Cercis canadensis</i>      | sp           |
| Tree7  | Intra-species | 40.0089 | -105.2699 | Fabales    | Fabaceae     | <i>Cercis canadensis</i>      | sp and indiv |
| Tree8  | Intra-species | 40.0089 | -105.2699 | Fabales    | Fabaceae     | <i>Cercis canadensis</i>      | sp and indiv |
| Tree9  | Intra-species | 40.0087 | -105.2699 | Rosales    | Cannabaceae  | <i>Celtis occidentalis</i>    | sp           |



**Fig. S1.** UPGMA dendrogram showing Kulczynski distances between bacterial communities within and across species for those 10 tree species where we examined replicate samples from the same tree and replicate samples from different individuals of the same tree species. ‘Indiv’ denotes samples collected from different individual trees of the same species, ‘Rep’ denotes replicate samples collected from a single tree.

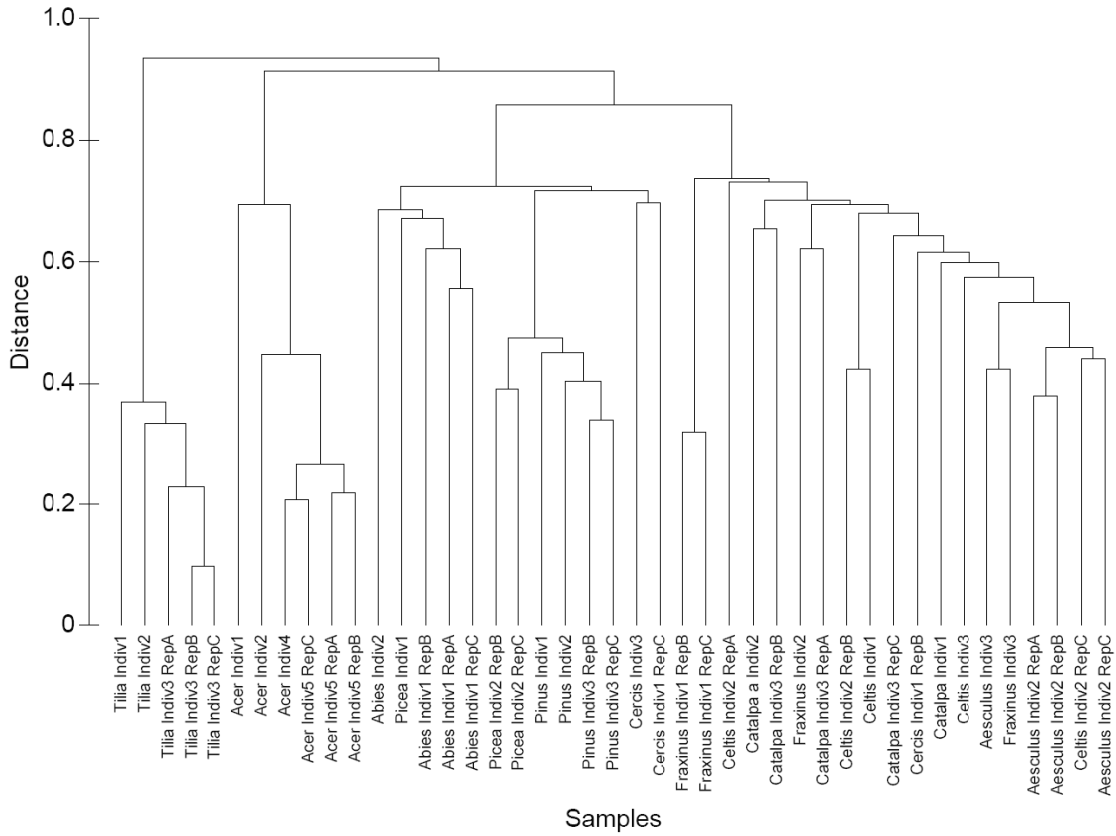

**Fig. S2.** Rarefaction curves showing the number of unique OTUs per sequencing effort for tree species sampled for the ‘inter-species’ study that are representative of phyllosphere communities with low, average, and high levels of bacterial diversity.

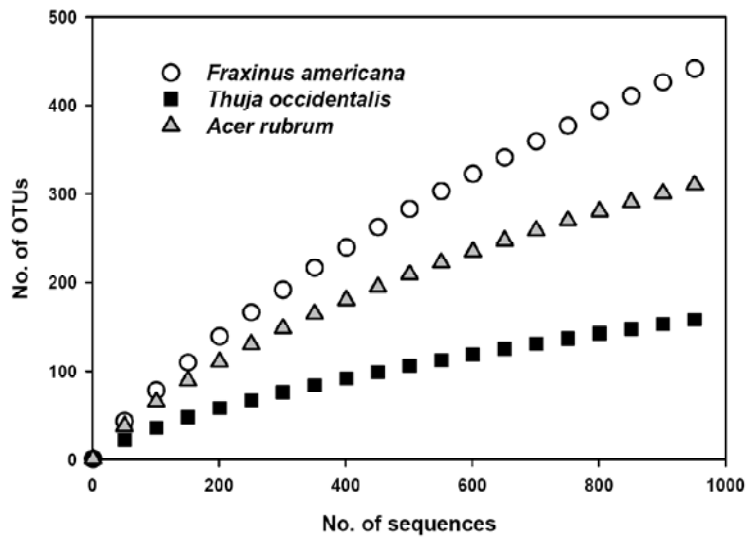

**Fig. S3.** NMDS plot with distances determined using the weighted Unifrac algorithm (a) and Kulczynski distance (b). Numbers correspond to the species numbers in table S1. This figure is identical to Figure 2, only labels have been added for each point.

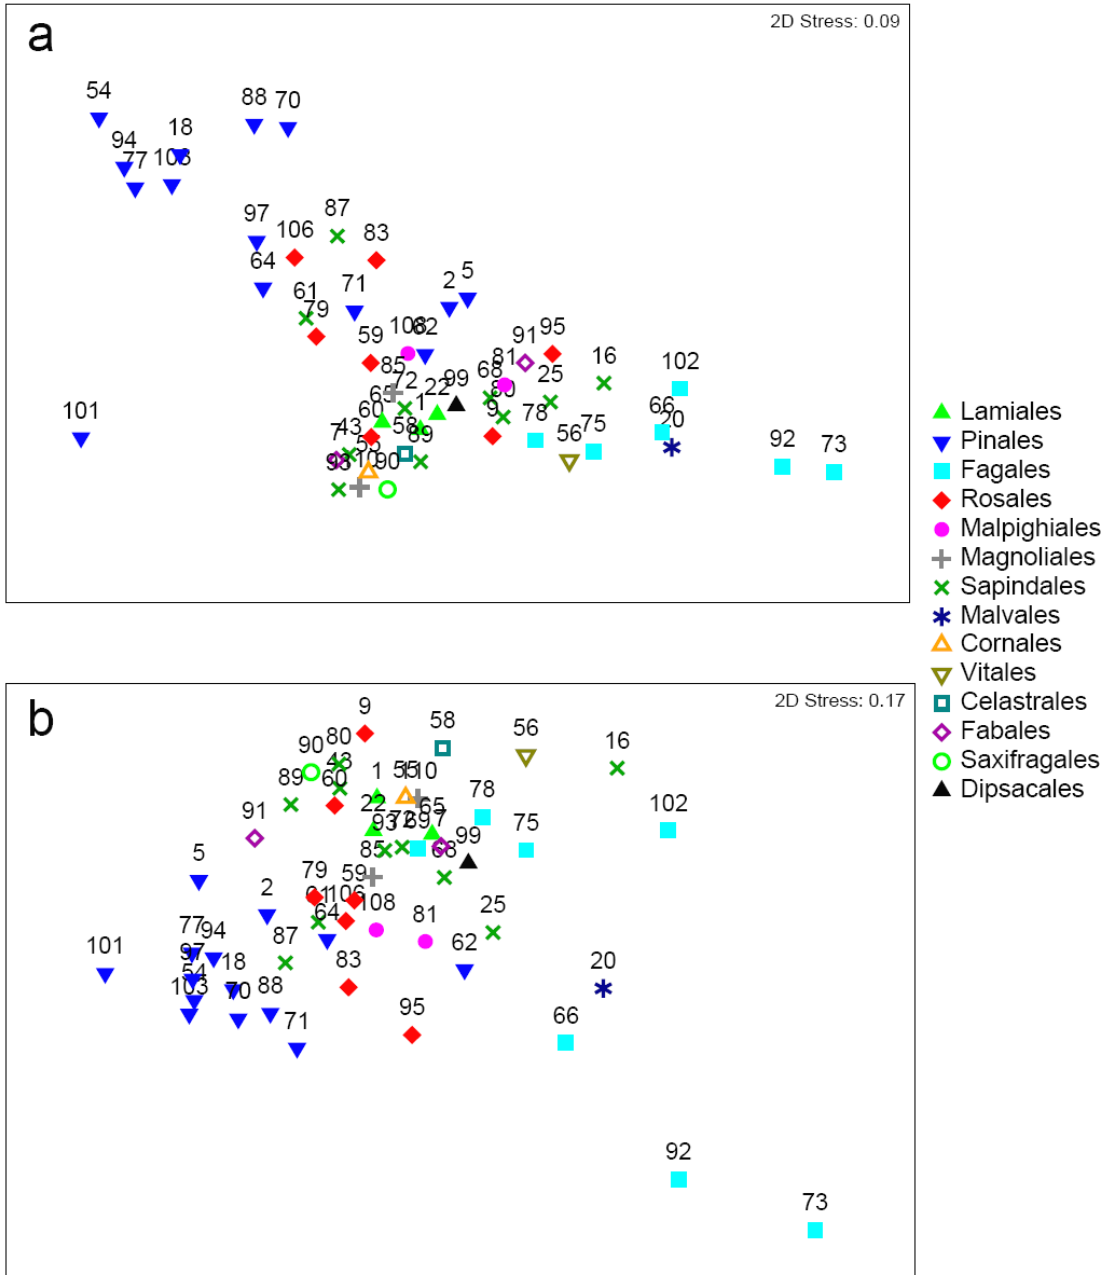

Supplement: NIHMS315035-supplement-Supporting.pdf [file NIHMS315035-supplement-Supporting.pdf]
